# Supplementary material
Source: PubMed Central journal article supplement (PMC5691330)

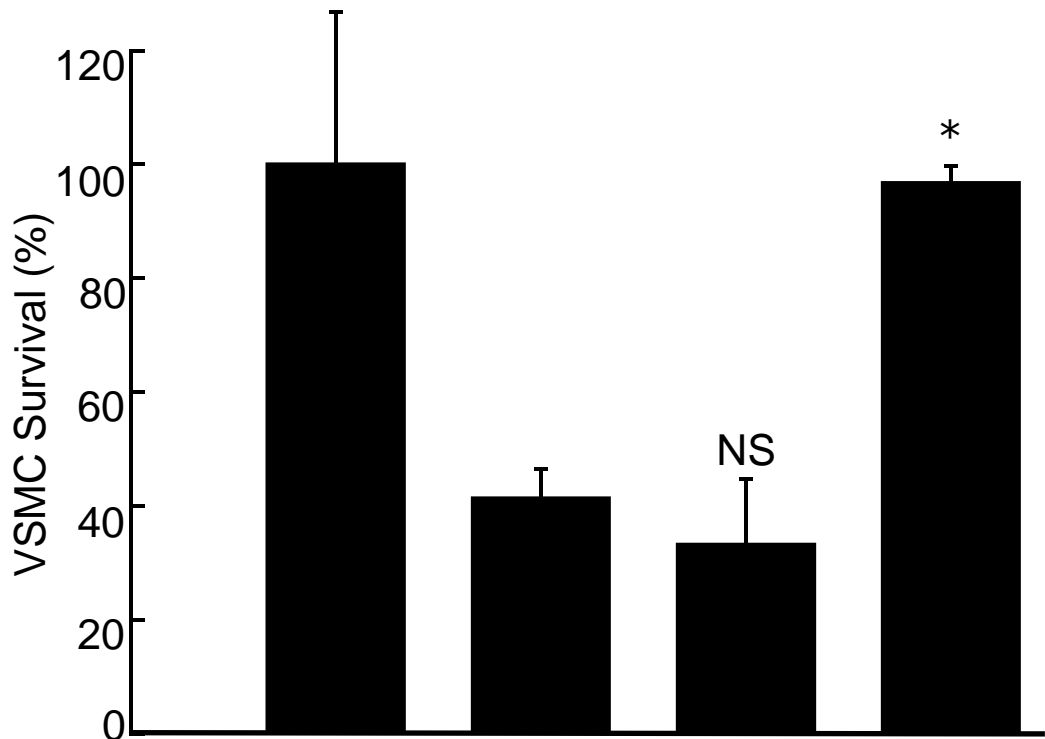

|                 |   |   |   |   |
|-----------------|---|---|---|---|
| VSMC            | + | + | + | + |
| U937            | + | + | + | + |
| Solid phase IgG |   | + | + | + |
| Anti-CD64       |   |   | + |   |
| Anti-CD16       |   |   |   | + |

Supplemental Figure S1

Supplement: mmc1.pdf [file mmc1.pdf]

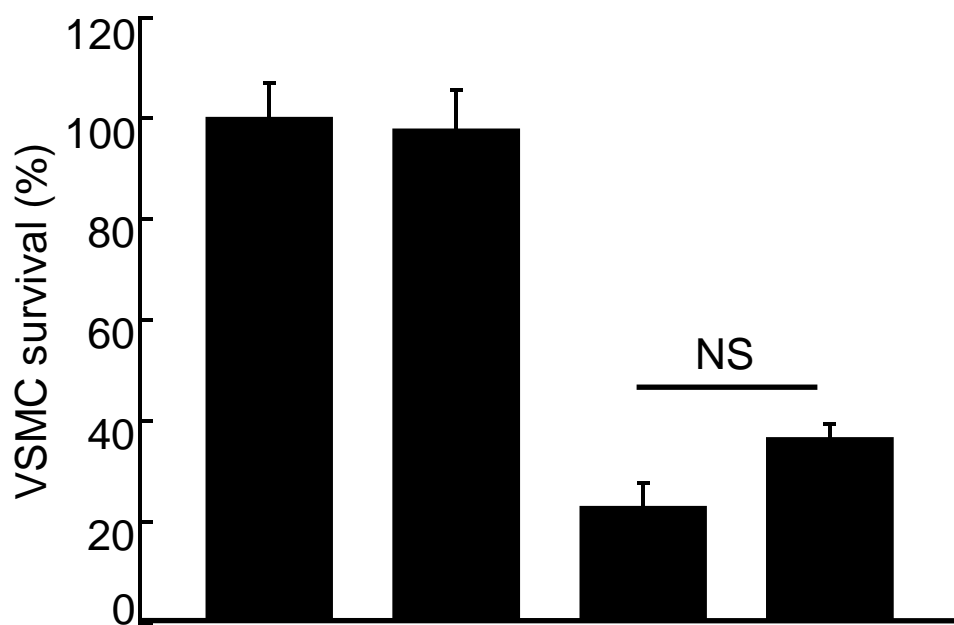

|                 |   |   |   |   |
|-----------------|---|---|---|---|
| VSMC            | + | + | + | + |
| U937            |   | + | + | + |
| Solid phase IgG |   |   | + | + |
| Fucoidan        |   |   |   | + |

Supplemental Figure S10

Supplement: mmc10.pdf [file mmc10.pdf]

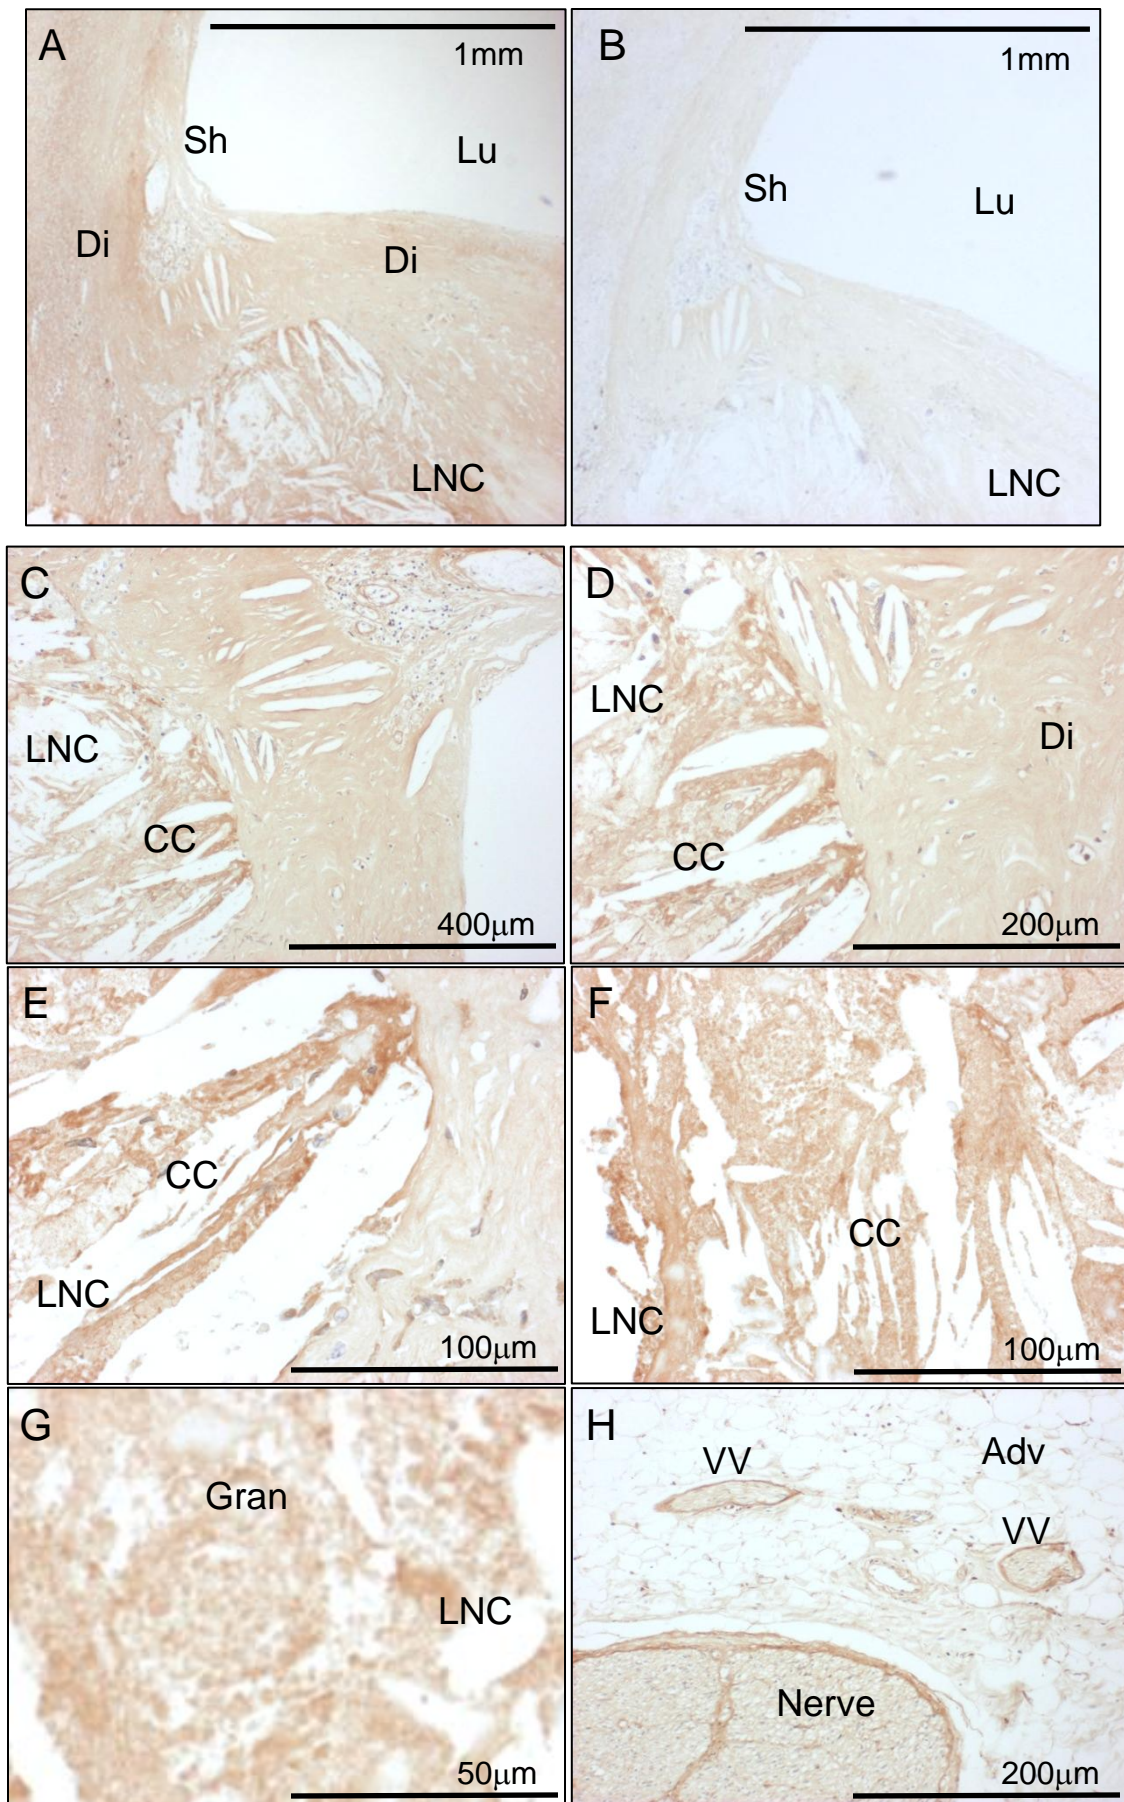

Supplemental Figure S11

Supplement: mmc11.pdf [file mmc11.pdf]

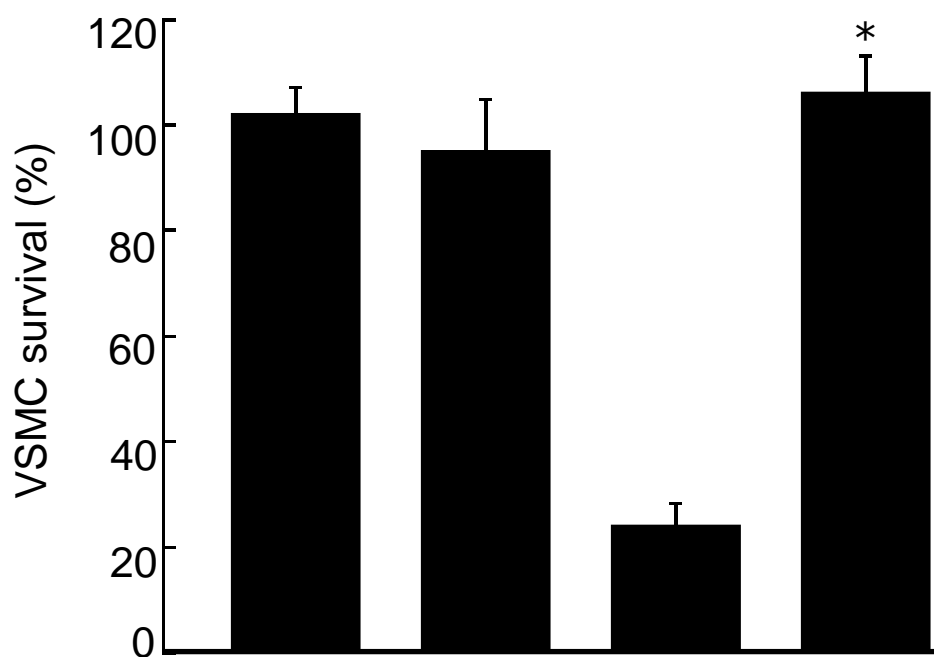

|                 |   |   |   |   |
|-----------------|---|---|---|---|
| VSMC            | + | + | + | + |
| U937            |   | + | + | + |
| Solid phase IgG |   |   | + | + |
| Catalase        |   |   |   | + |

Supplemental Figure S2

Supplement: mmc2.pdf [file mmc2.pdf]

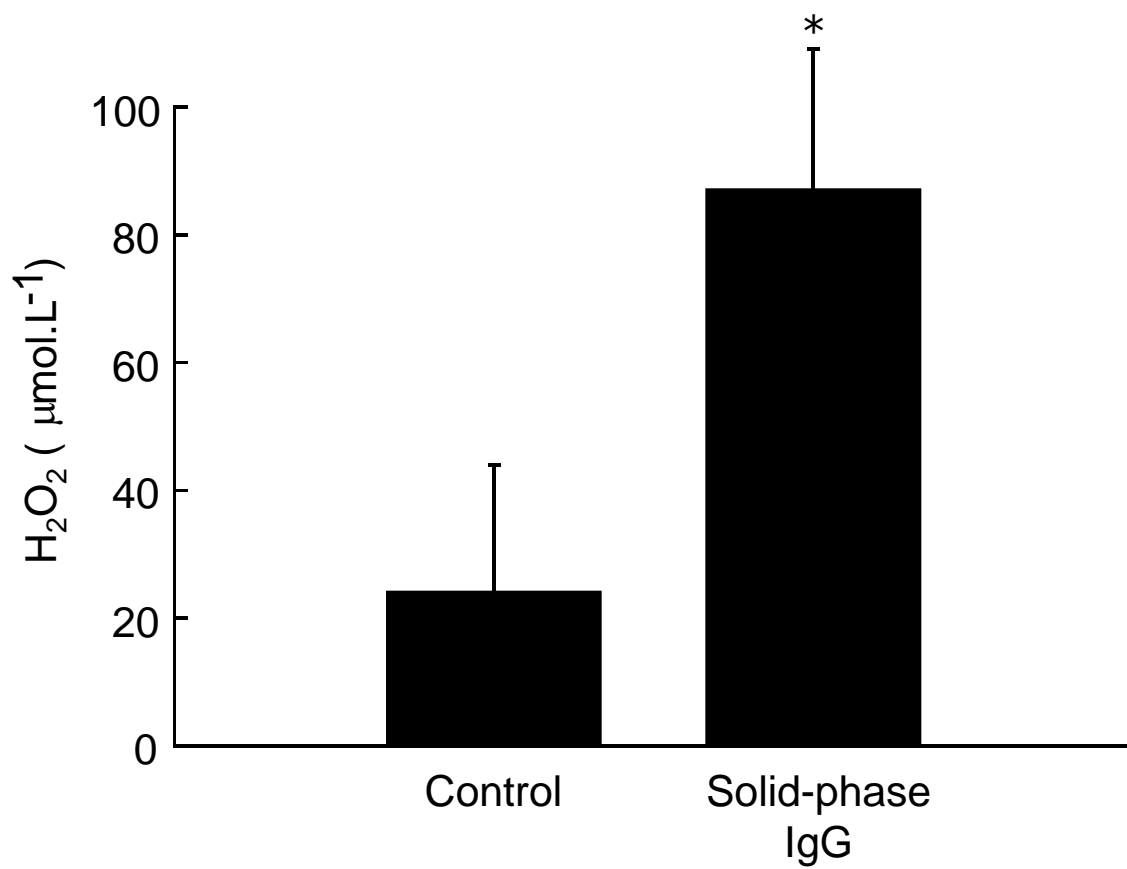

Supplemental Figure S3

Supplement: mmc3.pdf [file mmc3.pdf]

**A**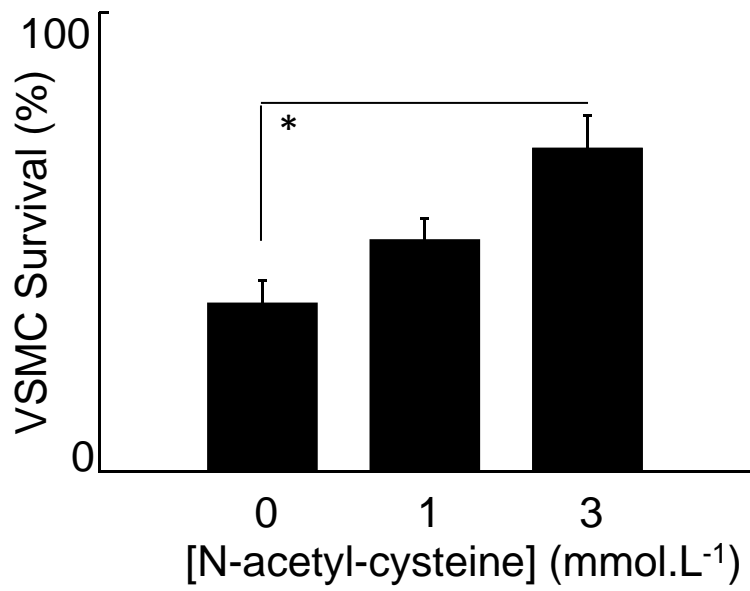**B**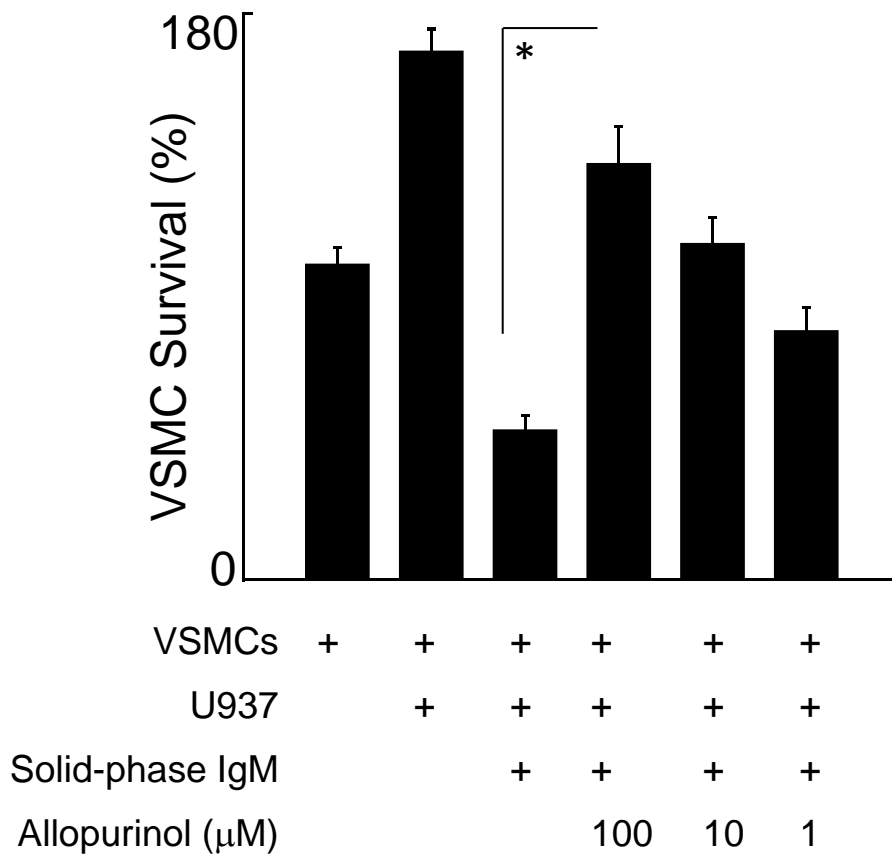

Supplemental Figure S4

Supplement: mmc4.pdf [file mmc4.pdf]

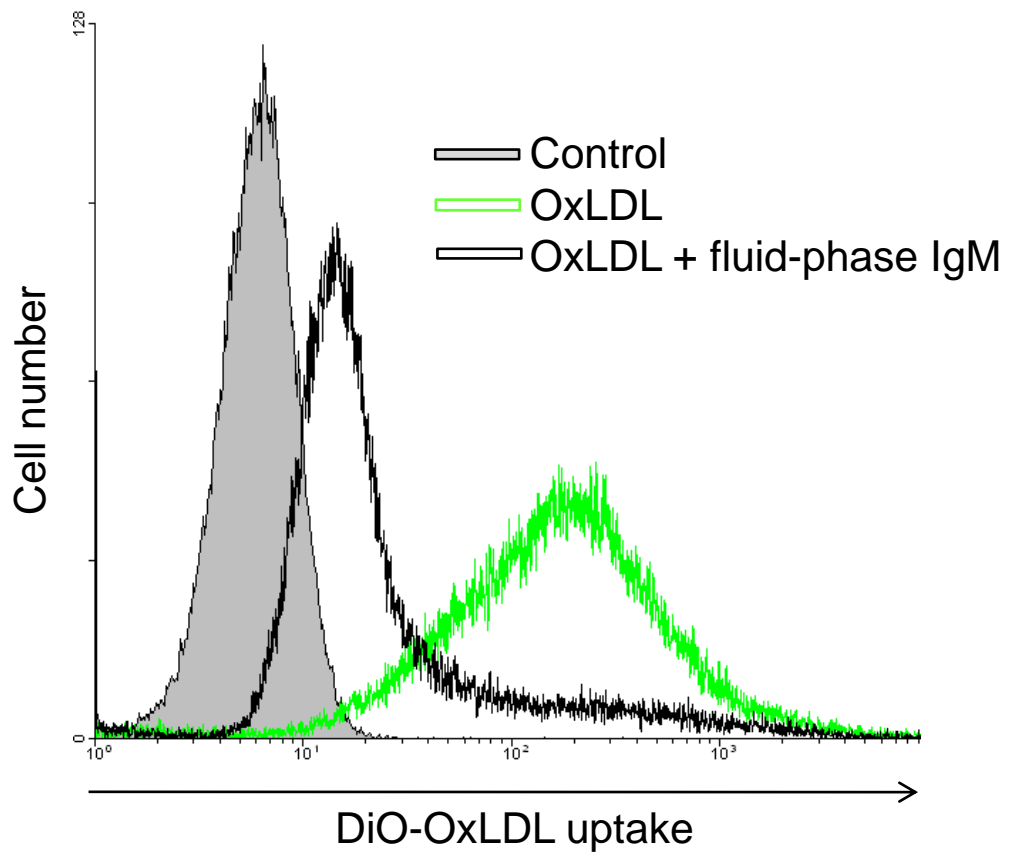

Supplemental Figure S5

Supplement: mmc5.pdf [file mmc5.pdf]

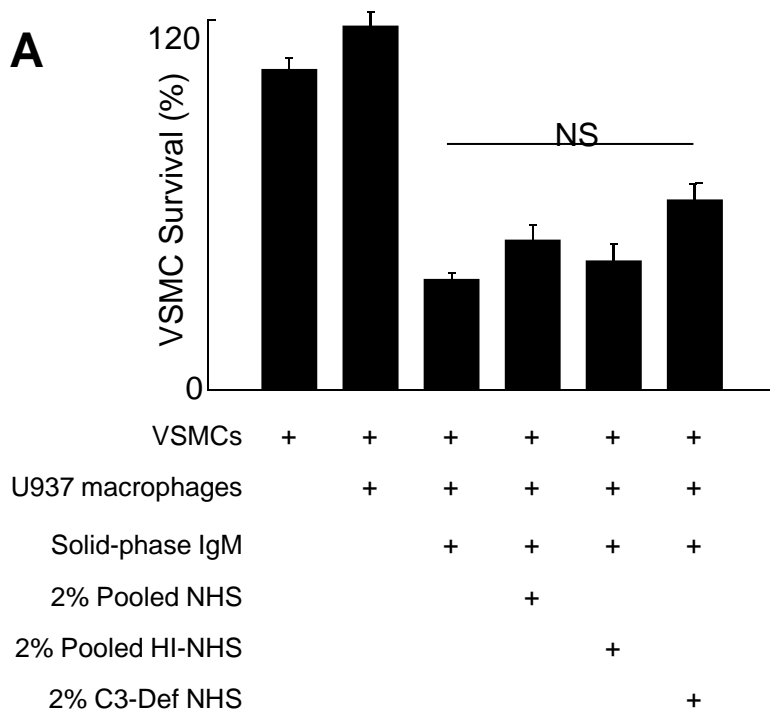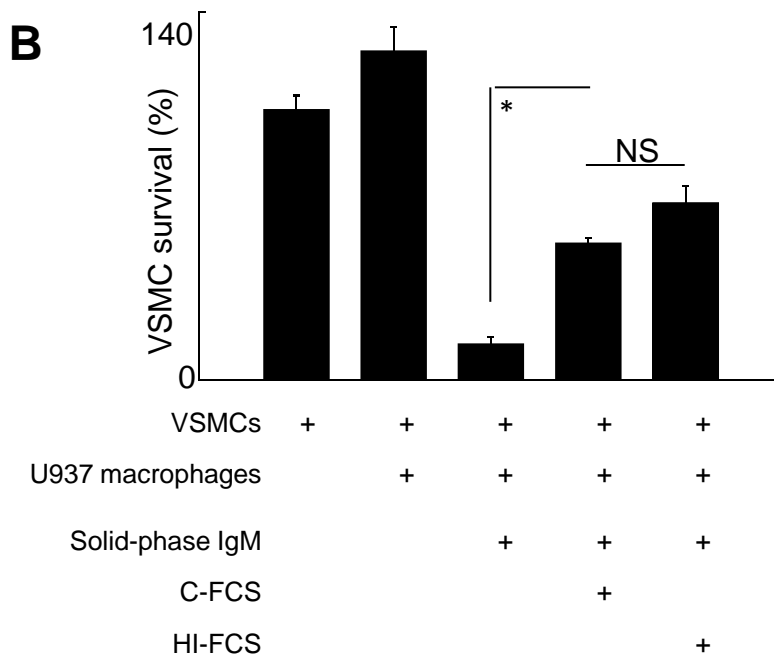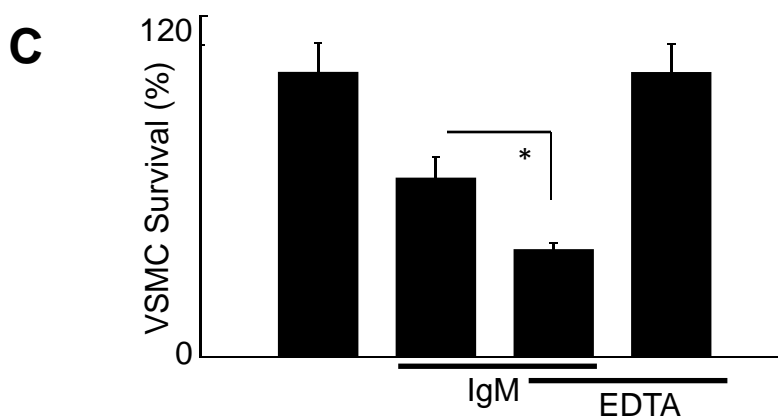

Supplemental Figure S6

Supplement: mmc6.pdf [file mmc6.pdf]

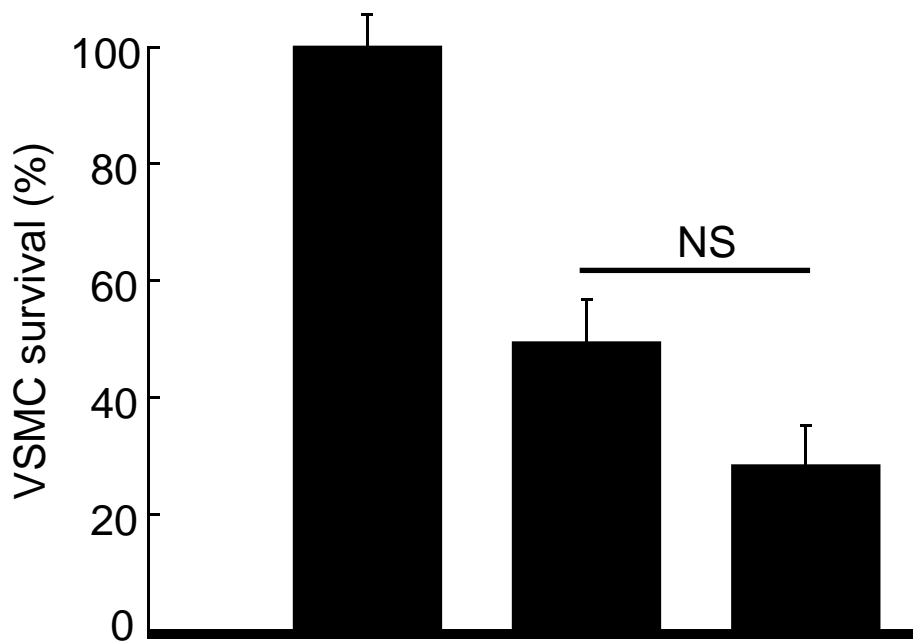

|                 |   |   |   |
|-----------------|---|---|---|
| VSMC            | + | + | + |
| U937            | + | + | + |
| Solid phase IgM |   | + | + |
| Anti-CD16       |   |   | + |

Supplemental Figure S7

Supplement: mmc7.pdf [file mmc7.pdf]

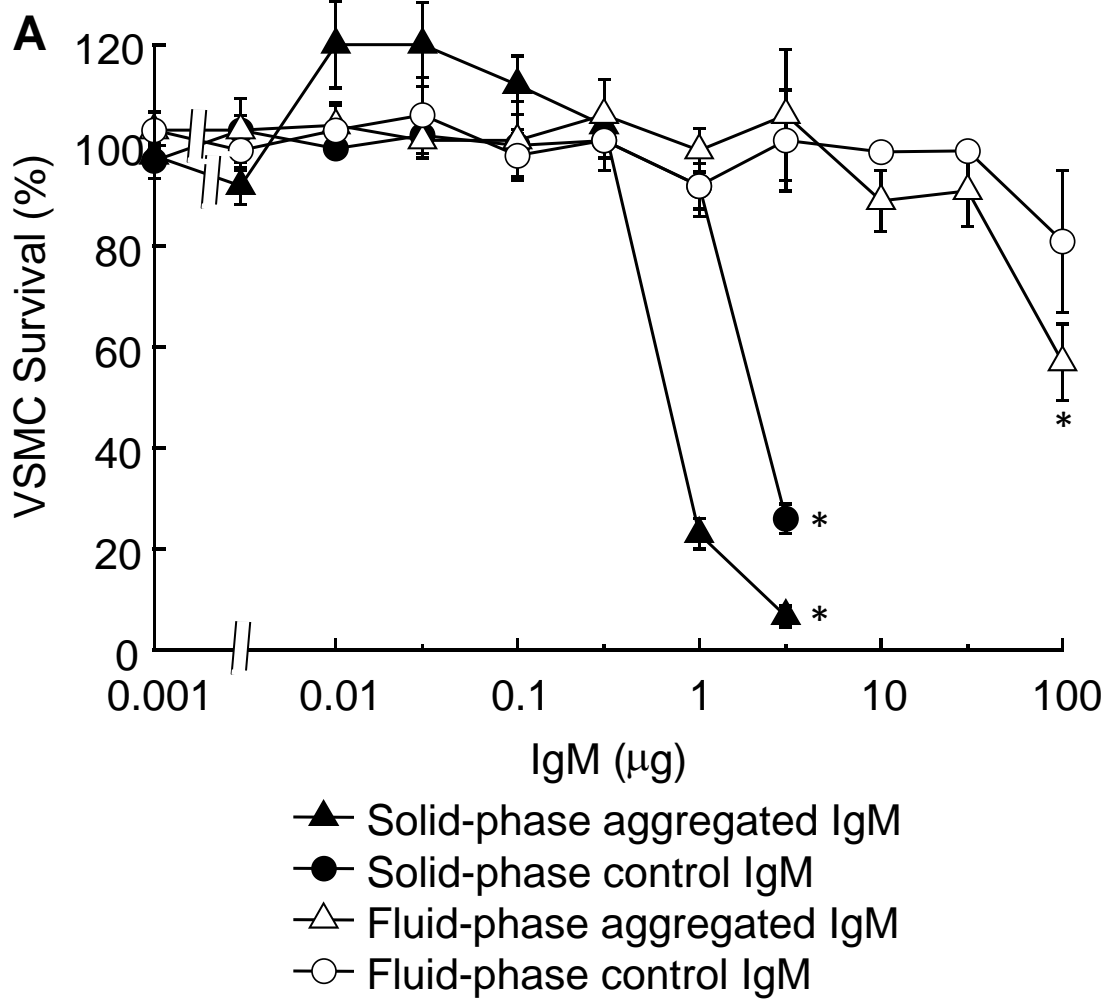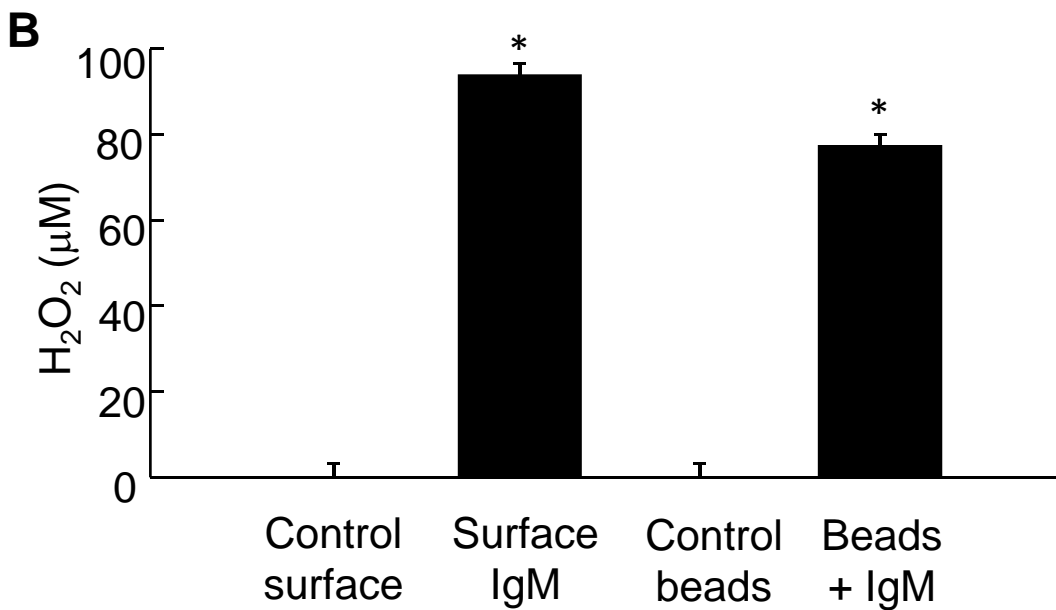

Supplemental Figure S8

Supplement: mmc8.pdf [file mmc8.pdf]

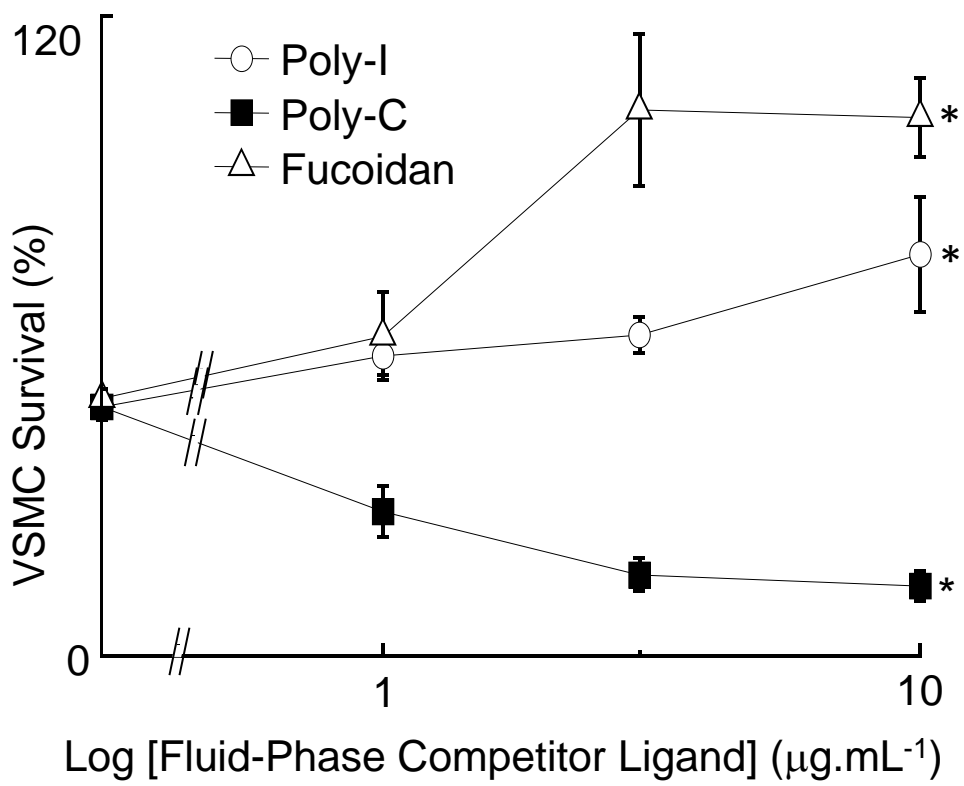

Supplemental Figure S9

Supplement: mmc9.pdf [file mmc9.pdf]
